# Supplementary material for: Drift, selection, or migration? Processes affecting genetic differentiation and variation along a latitudinal gradient in an amphibian
Source: PubMed Central journal article supplement (PMC5557520; doi:10.1186/s12862-017-1022-z), 2017-08-14
Supplement: 12862_2017_1022_MOESM1_ESM.pdf [file 12862_2017_1022_MOESM1_ESM.pdf]

**Table S1.** Microsatellites used in the study.

| Microsatellites list          | Primer sequence                                               | GenBank accession n° | Literature source            |
|-------------------------------|---------------------------------------------------------------|----------------------|------------------------------|
| <b>Neutral</b>                |                                                               |                      |                              |
| R1atCa17                      | F:CCCAATGTTTTTCGTTCAACC<br>R:TGATTAGGAACCCCTGTGTTG            | AF327361             | Garner <i>et al.</i> 2002    |
| Rtempμ4                       | F:TCATGCAGGCAAAGGTCAGG<br>R:AGAACCGCTGGTGTCCCAAC              | AF297975             | Rowe <i>et al.</i> 2001      |
| Rtempμ5                       | F:GATCCACGTATGAGGATAGTTCAG<br>R:AGCAGGACTTGTGGACTGCG          | AF297976             | Rowe <i>et al.</i> 2001      |
| RCIDII                        | F: GCTGAATTTTGGAAAGATGAG<br>R: CAGGAAGAGCAAAAGTTCC            | L42815               | Davey <i>et al.</i> 1995     |
| EU334906 (EU_06)              | F:AATAAACGTGCTCAGGAGTGTG<br>R: TGACCAGCTAAGATAAATCGCA         | BFG004               | Matsuba <i>et al.</i> 2009   |
| EU334912 (EU_12)              | F:CAGCTCTCAATAGGACAGGCTC<br>R:ATCAGAAGGGAAAGGGGATAAG          | BFG014               | Matsuba <i>et al.</i> 2009   |
| EU334915 (EU_15)              | F:GACCTCGATTAGCCAGAAGACA<br>R:GCCCAAGGAAACATTACACAAT          | BFG021               | Matsuba <i>et al.</i> 2009   |
| EU334919 (EU_19)              | F:GCTCCCATTCCTTCTCTCTTTC<br>R:TAAACACCTTGCGGAGTAAAGC          | BFG028               | Matsuba <i>et al.</i> 2009   |
| EU334924 (EU_24)              | F:TCTGGGACATTGAAGAAGGATT<br>R:AAATAGACTGGGCACGAAGGT           | BFG038               | Matsuba <i>et al.</i> 2009   |
| <b>Stabilizing selection</b>  |                                                               |                      |                              |
| RtCa25                        | F: GCCAGGGTATGTAACTTATGAGC<br>R: GTTTCAAATGTATATTATTGGTGCAATG | AF447866             | Garner <i>et al.</i> 2002    |
| WRA1-160                      | F: TCAAGCCCTGCATTACGGTGTG<br>R: CTGAAACATTCCCTGCAGCAGCT       | AJ419883             | Arens 2002                   |
| RRD590                        | F: GATTAGTAACAATAAAGGCACATG<br>R: CTTTGGAGCAGGAGGTG           | D78590               | Nakamura 1996                |
| R1atCa18                      | F:ACTGCTGCATCCAAATCTCC<br>R:GGGTATAGCCATACACCTGTGC            | AF327356             | Garner <i>et al.</i> 2002    |
| RtμP                          | F: TCATCCCTGCTACCTAATC<br>R: AAGCAATCAGGAATAAGGGG             | AF489582             | Pidancier <i>et al.</i> 2002 |
| <b>Diversifying selection</b> |                                                               |                      |                              |
| RC08604                       | F: TTGGAGACCCTCAGGG<br>R: TCATGGAAGTGTCTTATCAC                | U08604               | Chen <i>et al.</i> 1994      |

**Null alleles**

---

|                           |                                                           |           |                                 |
|---------------------------|-----------------------------------------------------------|-----------|---------------------------------|
| EU334911(EU_11)           | F:TCAGCAATAGCATCTCTAGGGC<br>R:TCTGCATGGGTTTACTCCAGAT      | BFG010    | Matsuba <i>et al.</i><br>2009   |
| RECALQ                    | F: GGAGGGTGAAGTCAACACT<br>R:ACATTTGAATATATAAACTAGTTAGATGC | X64324    | Zorzato 1992                    |
| R1atCa41                  | F: TGGTCTGCAAACACTCATTAC<br>R: GCAACAATGGGACTAATATAAGTGAG | AF327362  | Garner <i>et al.</i><br>2002    |
| <b>Tried but not used</b> |                                                           |           |                                 |
| WRA1-22                   | F: GCACTGTCCTGTGTAGGAAT<br>R: GTTGCTATGACACAGGGC          | AJ419881  | Arens 2002                      |
| WRA1-28                   | F: GCCAGACCGTGACATAAAT<br>R: TAACCCCTTCCATTGAGC           | AJ419882  | Arens 2002                      |
| WRA6-8                    | F: CTAATGGCATATTCCTGCTC<br>R: TCGTTTTTTGAAGTGGACTT        | AJ419884  | Arens 2002                      |
| Rtemp $\mu$ 9             | AGCGCCATGCTTATGCTGAG<br>TTGATATTTGCTTGCGGGGC              | AF297980  | Rowe <i>et al.</i> 2001         |
| RNTYR2                    | F: TGGGACTTTTGCTAGCTG<br>R: GCCATAGGCCATAGACG             | D37779    | Nishioka 1995                   |
| RtCa11                    | F: CCTCTCCAGTACCTTTTCAGG<br>R: GCCCCCAGTCAATAGATTATG      | AF447862  | Garner <i>et al.</i><br>2002    |
| Rtemp $\mu$ 7             | F:TCTTTCCTGCAACCCGTGTG<br>R:CCTTGTCCTCTGGCAAAGC           | AF297978  | Rowe <i>et al.</i> 2001         |
| Rt $\mu$ J                | F: TGGTCAACAACACACGGAAAGC<br>R: GATGTATTTGTCTCTGCTGCC     | AF489580  | Pidancier <i>et al.</i><br>2002 |
| RNTYR2                    | F: TGGGACTTTTGCTAGCTG<br>R: GCCATAGGCCATAGACG             | D37779    | Nishioka 1995                   |
| Rt2Ca9                    | F:TCCCTTAATTGTGCATTTTTCC<br>R:CTCTTTTCCCTTATAGGTGCAG      | AF327358. | Garner <i>et al.</i><br>2002    |

---
