# Supplementary material for: Drift, selection, or migration? Processes affecting genetic differentiation and variation along a latitudinal gradient in an amphibian
Source: PubMed Central journal article supplement (PMC5557520; doi:10.1186/s12862-017-1022-z), 2017-08-14
Supplement: 12862_2017_1022_MOESM2_ESM.pdf [file 12862_2017_1022_MOESM2_ESM.pdf]

**Table S2:** 16 microsatellites outlier analyses results from Lositan and Bayescan.

| Loci            | All gradient                  |                               |
|-----------------|-------------------------------|-------------------------------|
|                 | Lositan                       | Bayescan                      |
| <b>EU_06a</b>   | <i>neutral</i>                | <i>neutral</i>                |
| <b>EU_12a</b>   | <i>neutral</i>                | <i>neutral</i>                |
| <b>Eu_15a</b>   | <i>neutral</i>                | <i>neutral</i>                |
| <b>EU_19a</b>   | <i>neutral</i>                | <i>neutral</i>                |
| <b>EU_24a</b>   | <i>neutral</i>                | <i>neutral</i>                |
| <b>Rtemp4a</b>  | <i>neutral</i>                | <i>neutral</i>                |
| <b>Rtemp5a</b>  | <i>neutral</i>                | <i>neutral</i>                |
| <b>RtCa17a</b>  | <i>neutral</i>                | <i>neutral</i>                |
| <b>RD101a</b>   | <i>neutral</i>                | <i>neutral</i>                |
| <b>RRDD590a</b> | <i>Stabilizing selection</i>  | –                             |
| <b>RtuP</b>     | <i>Stabilizing selection</i>  | <i>Stabilizing selection</i>  |
| <b>WRA_160</b>  | <i>Stabilizing selection</i>  | <i>Stabilizing selection</i>  |
| <b>RCO8640</b>  | <i>Diversifying selection</i> | <i>Diversifying selection</i> |
| <b>RtCa25</b>   | –                             | <i>Diversifying selection</i> |
| <b>RtCAa18</b>  | –                             | <i>Stabilizing selection</i>  |
