# Supplementary material for: Drift, selection, or migration? Processes affecting genetic differentiation and variation along a latitudinal gradient in an amphibian
Source: PubMed Central journal article supplement (PMC5557520; doi:10.1186/s12862-017-1022-z), 2017-08-14
Supplement: 12862_2017_1022_MOESM3_ESM.pdf [file 12862_2017_1022_MOESM3_ESM.pdf]

**Table S3.** 15 microsatellites and MHC II exon 2 outlier analyses results from Lositan and Bayescan. Analyses were performed independently considering: all the gradient, northern populations as a cluster and southern populations as another cluster.

| Loci           | Northern cluster             |          | Southern cluster              |                              | Gradient                      |                               |
|----------------|------------------------------|----------|-------------------------------|------------------------------|-------------------------------|-------------------------------|
|                | Lositan                      | Bayescan | Lositan                       | Bayescan                     | Lositan                       | Bayescan                      |
| <b>RDD590</b>  | –                            | –        | –                             | –                            | <i>Stabilizing selection</i>  | –                             |
| <b>RtuP</b>    | <i>Stabilizing selection</i> | –        | –                             | <i>Stabilizing selection</i> | <i>Stabilizing selection</i>  | <i>Stabilizing selection</i>  |
| <b>WRA_160</b> | –                            | –        | –                             | –                            | <i>Stabilizing selection</i>  | –                             |
| <b>RCO8640</b> | –                            | –        | <i>Diversifying selection</i> | –                            | <i>Diversifying selection</i> | <i>Diversifying selection</i> |
| <b>MHC</b>     | –                            | –        | <i>Diversifying selection</i> | –                            | <i>Diversifying selection</i> | –                             |
| <b>RtCa25</b>  | –                            | –        | –                             | <i>Stabilizing selection</i> | –                             | <i>Stabilizing selection</i>  |
| <b>RtCAa18</b> | –                            | –        | –                             | <i>Stabilizing selection</i> | –                             | <i>Stabilizing selection</i>  |
