# Supplementary material for: Drift, selection, or migration? Processes affecting genetic differentiation and variation along a latitudinal gradient in an amphibian
Source: PubMed Central journal article supplement (PMC5557520; doi:10.1186/s12862-017-1022-z), 2017-08-14

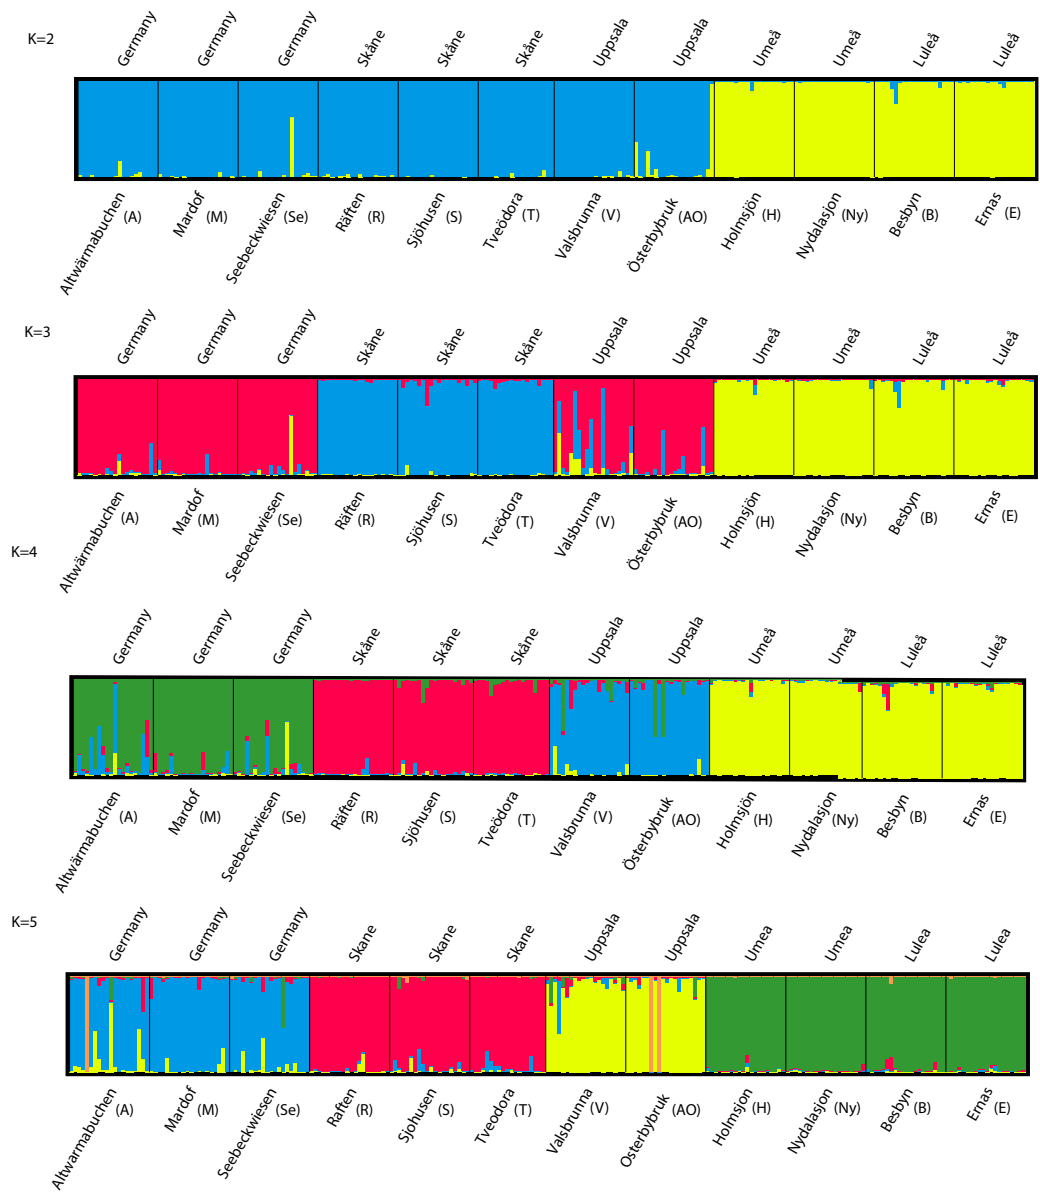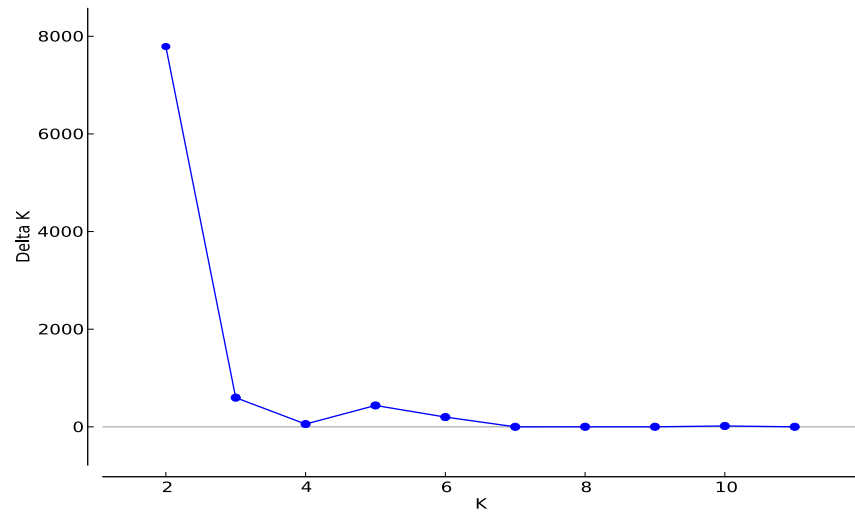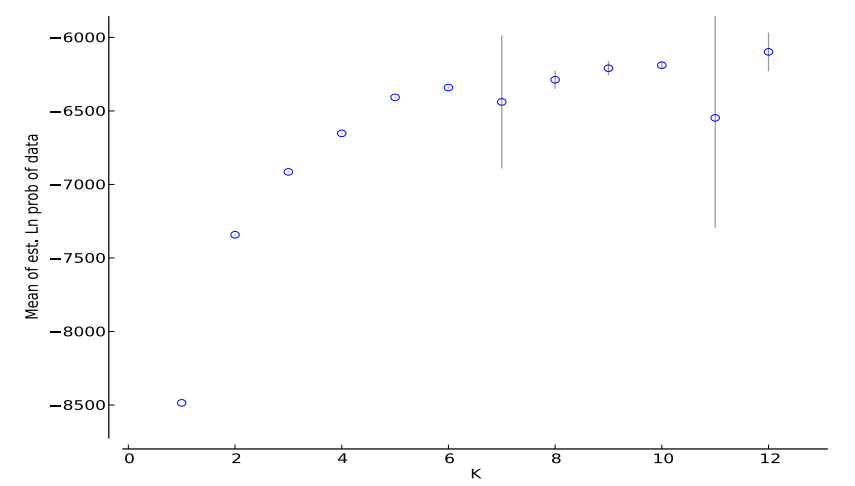

Supplement: 12862_2017_1022_MOESM5_ESM.pdf [file 12862_2017_1022_MOESM5_ESM.pdf]
