# Supplementary material for: Drift, selection, or migration? Processes affecting genetic differentiation and variation along a latitudinal gradient in an amphibian
Source: PubMed Central journal article supplement (PMC5557520; doi:10.1186/s12862-017-1022-z), 2017-08-14
Supplement: 12862_2017_1022_MOESM7_ESM.pdf [file 12862_2017_1022_MOESM7_ESM.pdf]

**Table S4.** Pairwise  $F_{ST}$ s. a) MHC gene  $F_{ST}$  pairwise comparisons and b) neutral microsatellite  $F_{ST}$  pairwise comparisons, respectively.

| a)        | <b>A</b> | <b>B</b> | <b>E</b> | <b>H</b> | <b>M</b> | <b>Ny</b> | <b>AÖ</b> | <b>R</b> | <b>Se</b> | <b>S</b> | <b>T</b> | <b>V</b> |
|-----------|----------|----------|----------|----------|----------|-----------|-----------|----------|-----------|----------|----------|----------|
| <b>A</b>  | 0.000    | *        |          |          |          |           |           |          |           |          |          |          |
| <b>B</b>  | 0.418    | 0.000    | *        |          |          |           |           |          |           |          |          |          |
| <b>E</b>  | 0.404    | 0.004    | 0.000    | *        |          |           |           |          |           |          |          |          |
| <b>H</b>  | 0.322    | 0.195    | 0.116    | 0.000    | *        |           |           |          |           |          |          |          |
| <b>M</b>  | 0.014    | 0.506    | 0.497    | 0.421    | 0.000    | *         |           |          |           |          |          |          |
| <b>Ny</b> | 0.302    | 0.237    | 0.186    | 0.045    | 0.411    | 0.000     | *         |          |           |          |          |          |
| <b>AÖ</b> | 0.149    | 0.459    | 0.448    | 0.364    | 0.167    | 0.326     | 0.000     | *        |           |          |          |          |
| <b>R</b>  | 0.293    | 0.458    | 0.450    | 0.366    | 0.312    | 0.352     | 0.339     | 0.000    | *         |          |          |          |
| <b>Se</b> | 0.022    | 0.356    | 0.344    | 0.250    | 0.023    | 0.223     | 0.059     | 0.174    | 0.000     | *        |          |          |
| <b>S</b>  | 0.240    | 0.438    | 0.418    | 0.294    | 0.282    | 0.261     | 0.295     | 0.028    | 0.134     | 0.000    | *        |          |
| <b>T</b>  | 0.266    | 0.523    | 0.506    | 0.380    | 0.317    | 0.320     | 0.326     | 0.139    | 0.184     | 0.036    | 0.000    | *        |
| <b>V</b>  | 0.349    | 0.715    | 0.716    | 0.668    | 0.333    | 0.641     | 0.179     | 0.567    | 0.301     | 0.552    | 0.582    | 0.000    |

| b)        | <b>A</b> | <b>B</b> | <b>E</b> | <b>H</b> | <b>M</b> | <b>Ny</b> | <b>AÖ</b> | <b>R</b> | <b>Se</b> | <b>S</b> | <b>T</b> | <b>V</b> |
|-----------|----------|----------|----------|----------|----------|-----------|-----------|----------|-----------|----------|----------|----------|
| <b>A</b>  | 0.000    | *        |          |          |          |           |           |          |           |          |          |          |
| <b>B</b>  | 0.311    | 0.000    | *        |          |          |           |           |          |           |          |          |          |
| <b>E</b>  | 0.295    | 0.053    | 0.000    | *        |          |           |           |          |           |          |          |          |
| <b>H</b>  | 0.202    | 0.145    | 0.129    | 0.000    | *        |           |           |          |           |          |          |          |
| <b>M</b>  | 0.048    | 0.321    | 0.311    | 0.208    | 0.000    | *         |           |          |           |          |          |          |
| <b>Ny</b> | 0.227    | 0.150    | 0.171    | 0.031    | 0.246    | 0.000     | *         |          |           |          |          |          |
| <b>AÖ</b> | 0.072    | 0.299    | 0.268    | 0.189    | 0.109    | 0.219     | 0.000     | *        |           |          |          |          |
| <b>R</b>  | 0.129    | 0.332    | 0.283    | 0.227    | 0.150    | 0.256     | 0.136     | 0.000    | *         |          |          |          |
| <b>Se</b> | 0.031    | 0.293    | 0.283    | 0.213    | 0.036    | 0.238     | 0.093     | 0.136    | 0.000     | *        |          |          |
| <b>S</b>  | 0.116    | 0.338    | 0.286    | 0.231    | 0.133    | 0.257     | 0.115     | 0.043    | 0.123     | 0.000    | *        |          |
| <b>T</b>  | 0.122    | 0.325    | 0.294    | 0.230    | 0.107    | 0.251     | 0.122     | 0.040    | 0.102     | 0.031    | 0.000    | *        |
| <b>V</b>  | 0.073    | 0.306    | 0.268    | 0.163    | 0.104    | 0.184     | 0.037     | 0.098    | 0.093     | 0.101    | 0.109    | 0.000    |
