# Supplementary material for: Drift, selection, or migration? Processes affecting genetic differentiation and variation along a latitudinal gradient in an amphibian
Source: PubMed Central journal article supplement (PMC5557520; doi:10.1186/s12862-017-1022-z), 2017-08-14
Supplement: 12862_2017_1022_MOESM9_ESM.pdf [file 12862_2017_1022_MOESM9_ESM.pdf]

**Table S5.** Relative allele frequency for all the MHC alleles found along the latitudinal gradient. N= number of individual per population, A<sub>s</sub> = Alleles within sampling areas.

| A <sub>s</sub> | Germany |      |      | Skane |       |       | Uppsala |       | Umeå  |       | Luleå |       |
|----------------|---------|------|------|-------|-------|-------|---------|-------|-------|-------|-------|-------|
| N              | 14      | 10   | 10   | 20    | 20    | 19    | 18      | 19    | 19    | 19    | 20    | 19    |
| Raar_DAB*01    | 0.071   | 0    | 0    | 0     | 0     | 0     | 0       | 0     | 0     | 0     | 0     | 0     |
| Raar_DAB*02    | 0.321   | 0.1  | 0.1  | 0     | 0     | 0     | 0       | 0     | 0     | 0     | 0     | 0     |
| Raar_DAB*03    | 0.107   | 0    | 0    | 0     | 0     | 0     | 0       | 0     | 0     | 0     | 0     | 0     |
| Raar_DAB*04    | 0.143   | 0.1  | 0.15 | 0     | 0     | 0     | 0       | 0     | 0     | 0     | 0     | 0     |
| Raar_DAB*05    | 0.071   | 0.2  | 0.15 | 0     | 0     | 0     | 0       | 0     | 0     | 0     | 0     | 0     |
| Raar_DAB*06    | 0.036   | 0    | 0    | 0     | 0.05  | 0     | 0       | 0     | 0     | 0     | 0     | 0     |
| Raar_DAB*07    | 0.143   | 0    | 0    | 0     | 0     | 0     | 0       | 0     | 0     | 0     | 0     | 0     |
| Raar_DAB*08    | 0.107   | 0    | 0.05 | 0     | 0     | 0     | 0       | 0     | 0     | 0     | 0     | 0     |
| Raar_DAB*09    | 0       | 0    | 0    | 0     | 0     | 0     | 0.167   | 0     | 0.026 | 0.026 | 0     | 0     |
| Raar_DAB*10    | 0       | 0    | 0    | 0     | 0     | 0     | 0.028   | 0     | 0     | 0     | 0     | 0     |
| Raar_DAB*11    | 0       | 0    | 0    | 0     | 0     | 0     | 0.028   | 0     | 0     | 0     | 0     | 0     |
| Raar_DAB*12    | 0       | 0    | 0    | 0     | 0     | 0     | 0.139   | 0.026 | 0     | 0     | 0     | 0     |
| Raar_DAB*13    | 0       | 0    | 0    | 0     | 0     | 0     | 0.056   | 0.026 | 0     | 0     | 0     | 0     |
| Raar_DAB*14    | 0       | 0.05 | 0    | 0     | 0     | 0     | 0.25    | 0     | 0     | 0     | 0     | 0     |
| Raar_DAB*15    | 0       | 0.2  | 0.2  | 0.05  | 0.125 | 0.053 | 0.167   | 0     | 0.105 | 0.289 | 0     | 0     |
| Raar_DAB*16    | 0       | 0    | 0    | 0     | 0     | 0     | 0.028   | 0     | 0     | 0     | 0     | 0     |
| Raar_DAB*17    | 0       | 0    | 0    | 0     | 0     | 0     | 0.028   | 0.421 | 0     | 0     | 0     | 0     |
| Raar_DAB*18    | 0       | 0    | 0    | 0     | 0     | 0     | 0.028   | 0     | 0     | 0.053 | 0     | 0     |
| Raar_DAB*19    | 0       | 0    | 0    | 0     | 0     | 0     | 0.083   | 0     | 0     | 0     | 0     | 0     |
| Raar_DAB*20    | 0       | 0    | 0    | 0     | 0     | 0     | 0       | 0     | 0.447 | 0.395 | 0.825 | 0.711 |
| Raar_DAB*21    | 0       | 0    | 0    | 0     | 0     | 0     | 0       | 0     | 0.395 | 0.053 | 0.125 | 0.237 |
| Raar_DAB*22    | 0       | 0    | 0    | 0     | 0     | 0.053 | 0       | 0     | 0.026 | 0     | 0     | 0     |
| Raar_DAB*23    | 0       | 0    | 0    | 0     | 0     | 0     | 0       | 0     | 0     | 0.026 | 0     | 0     |
| Raar_DAB*24    | 0       | 0    | 0    | 0     | 0     | 0     | 0       | 0     | 0     | 0.105 | 0     | 0     |
| Raar_DAB*25    | 0       | 0    | 0    | 0     | 0     | 0     | 0       | 0     | 0     | 0.026 | 0     | 0     |
| Raar_DAB*26    | 0       | 0    | 0    | 0     | 0.025 | 0     | 0       | 0     | 0     | 0.026 | 0     | 0     |
| Raar_DAB*27    | 0       | 0    | 0    | 0.45  | 0.075 | 0.184 | 0       | 0     | 0     | 0     | 0     | 0     |
| Raar_DAB*28    | 0       | 0    | 0.1  | 0.35  | 0.325 | 0.658 | 0       | 0     | 0     | 0     | 0     | 0     |
| Raar_DAB*29    | 0       | 0    | 0    | 0.075 | 0     | 0     | 0       | 0     | 0     | 0     | 0     | 0     |
| Raar_DAB*30    | 0       | 0    | 0    | 0.05  | 0     | 0     | 0       | 0     | 0     | 0     | 0     | 0     |
| Raar_DAB*31    | 0       | 0    | 0    | 0.025 | 0.05  | 0     | 0       | 0     | 0     | 0     | 0     | 0     |
| Raar_DAB*32    | 0       | 0    | 0    | 0     | 0     | 0     | 0       | 0     | 0     | 0     | 0.025 | 0     |
| Raar_DAB*33    | 0       | 0    | 0    | 0     | 0     | 0     | 0       | 0     | 0     | 0     | 0.025 | 0     |
| Raar_DAB*34    | 0       | 0    | 0    | 0     | 0.1   | 0     | 0       | 0     | 0     | 0     | 0     | 0     |
| Raar_DAB*35    | 0       | 0    | 0    | 0     | 0.025 | 0     | 0       | 0     | 0     | 0     | 0     | 0     |
| Raar_DAB*36    | 0       | 0    | 0    | 0     | 0.025 | 0     | 0       | 0     | 0     | 0     | 0     | 0     |
| Raar_DAB*37    | 0       | 0    | 0    | 0     | 0.05  | 0.026 | 0       | 0     | 0     | 0     | 0     | 0     |
| Raar_DAB*38    | 0       | 0    | 0    | 0     | 0.025 | 0     | 0       | 0     | 0     | 0     | 0     | 0     |
| Raar_DAB*39    | 0       | 0    | 0    | 0     | 0.025 | 0     | 0       | 0     | 0     | 0     | 0     | 0     |
| Raar_DAB*40    | 0       | 0    | 0    | 0     | 0.05  | 0     | 0       | 0     | 0     | 0     | 0     | 0     |
