# Supplementary material for: Drift, selection, or migration? Processes affecting genetic differentiation and variation along a latitudinal gradient in an amphibian
Source: PubMed Central journal article supplement (PMC5557520; doi:10.1186/s12862-017-1022-z), 2017-08-14
Supplement: 12862_2017_1022_MOESM10_ESM.pdf [file 12862_2017_1022_MOESM10_ESM.pdf]

**Table S6.** Information about pond locations along the latitudinal gradient.

| <b>Locality</b>      | <b>Sampling area</b> | <b>code</b> | <b>Coordinates</b> |               |
|----------------------|----------------------|-------------|--------------------|---------------|
| <b>Altwarmbüchen</b> |                      | A           | 52°25'15.81"N      | 9°51'27.71"E  |
| <b>Mardorf</b>       | Germany              | M           | 52°30'31.2"N       | 9°19'44.4"E   |
| <b>Seebeekwiesen</b> |                      | Se          | 52°27'52.9"N       | 10°05'03.8"E  |
| <b>Sjöhusen</b>      |                      | R           | 55°32'42.40"N      | 13°16'24.53"E |
| <b>Tvedöra</b>       | Skåne                | S           | 55°42'0.81"N       | 13°25'51.54"E |
| <b>Räfte</b>         |                      | T           | 55°43'17.34"N      | 13°17'3.02"E  |
| <b>Österbybruk</b>   |                      | AÖ          | 60°10'42.09"N      | 17°51'16.06"E |
| <b>Valsbrunna</b>    | Uppsala              | V           | 59°45'14.66"N      | 17° 2'8.95"E  |
| <b>Holmsjön</b>      |                      | H           | 63°45'27.21"N      | 20°24'22.02"E |
| <b>Nydalsjön</b>     | Umeå                 | Ny          | 63°49'23.44"N      | 20°20'1.60"E  |
| <b>Besbyn</b>        |                      | B           | 65°41'5.19"N       | 22°12'43.80"E |
| <b>Ernäs</b>         | Luleå                | E           | 65°31'14.69"N      | 21°41'12.78"E |
