# Supplementary material for: Drift, selection, or migration? Processes affecting genetic differentiation and variation along a latitudinal gradient in an amphibian
Source: PubMed Central journal article supplement (PMC5557520; doi:10.1186/s12862-017-1022-z), 2017-08-14
Supplement: 12862_2017_1022_MOESM11_ESM.pdf [file 12862_2017_1022_MOESM11_ESM.pdf]

**Table S7.** PCR conditions for a total volume of 10 µl reaction for the neutral microsatellites finally used in the study

| Microsatellite Name     | Repeat Unit                    | Size    | PCR type              | PCR Mix volumes (µl)     |                    |                 |               |        |      |               |              |             |    |        |            |
|-------------------------|--------------------------------|---------|-----------------------|--------------------------|--------------------|-----------------|---------------|--------|------|---------------|--------------|-------------|----|--------|------------|
|                         |                                |         |                       | MgCl <sub>2</sub> (50mM) | ddH <sub>2</sub> O | Q solution (5x) | BSA (20mg/ml) | Buffer | Taq  | Primer (10µM) | dNTPs (10mM) | Genomic DNA | Ta | cycles | Touch down |
| <b>EU334906 (EU_06)</b> | (GT)9                          | 133–157 | Dream taq (5Units/ul) | –                        | 7                  | –               | 0.75          | 1      | 0.05 | 0.25          | 0.2          | 1           | 57 | 35     | –          |
| <b>EU334912 (EU_12)</b> | (AC)21                         | 93–141  | Dream taq (5Units/ul) | –                        | 7                  | –               | 0.75          | 1      | 0.05 | 0.25          | 0.2          | 1           | 57 | 35     | –          |
| <b>EU334915 (EU_15)</b> | (GT)11                         | 137–161 | Dream taq (5Units/ul) | –                        | 7                  | –               | 0.75          | 1      | 0.05 | 0.25          | 0.2          | 1           | 58 | 35     | –          |
| <b>EU334919 (EU_19)</b> | (CT)8                          | 277–283 | Dream taq (5Units/ul) | –                        | 7                  | –               | 0.75          | 1      | 0.05 | 0.25          | 0.2          | 1           | 59 | 35     | –          |
| <b>EU334924 (EU_24)</b> | (AG)16                         | 176–196 | type it (2x)          | –                        | 1                  | 1               | –             | –      | 5    | 1             | –            | 1           | 52 | 35     | –          |
| <b>Rtempµ4</b>          | (AC)16                         | 106–142 | Dream taq (5Units/ul) | –                        | 7                  | –               | 0.75          | 1      | 0.05 | 0.25          | 0.2          | 1           | 62 | 35     | –          |
| <b>RCIDII</b>           | (TA)9                          | 173     | Dream taq (5Units/ul) | –                        | 7                  | –               | 0.75          | 1      | 0.05 | 0.25          | 0.2          | 1           | 44 | 35     | –          |
| <b>R1atCa17</b>         | (CA)8(C)10                     | 113     | type it (2x)          | –                        | 1                  | 1               | –             | –      | 5    | 1             | –            | 1           | 52 | 35     | –          |
| <b>Rtempµ5</b>          | (GT)15                         | 117–157 | type it (2x)          | –                        | 1                  | 1               | –             | –      | 5    | 1             | –            | 2           | 53 | 35     | –          |
| <b>RECALQ</b>           | (GAT/C)42                      | 208     | Fermentas (5Units/ul) | 1,35                     | 7                  | –               | –             | 1      | 0.05 | 0,2           | 0,2          | 1           | 48 | 35     | 53-48      |
| <b>RtCa25</b>           | (TA)7(CA)5AA(CA)13T(AC)6       | 137     | Fermentas (5Units/ul) | 1,35                     | 7                  | –               | –             | 1      | 0.05 | 0,2           | 0,2          | 1           | 57 | 35     | 62-57      |
| <b>RtuP</b>             | (TC)6                          | 173     | Dream taq (5Units/ul) | –                        | 7                  | –               | 0.75          | 1      | 0.05 | 0.25          | 0.2          | 1           | 44 | 35     | –          |
| <b>RtCa18</b>           | (CA)12(N <sup>+</sup> )13(G)13 | 111     | Fermentas (5Units/ul) | 1,35                     | 7                  | –               | –             | 1      | 0.05 | 0,2           | 0,2          | 1           | 60 | 35     | –          |
| <b>RtCa41</b>           | (CA)1(TA)1(CA)7(CG)1(CA)2      | 154     | type it (2x)          | –                        | 1                  | 1               | –             | –      | 5    | 1             | –            | 1           | 52 | 35     | –          |
| <b>RDD590</b>           | (GAA)3(GAG)13                  | 176     | type it (2x)          | –                        | 1                  | 1               | –             | –      | 5    | 1             | –            | 1           | 54 | 35     | –          |
| <b>EU334911(EU_11)</b>  | (AC)19                         | 150-350 | Dream taq (5Units/ul) | –                        | 7                  | –               | 0.75          | 1      | 0.05 | 0.25          | 0.2          | 1           | 57 | 35     | –          |
| <b>WRA_160</b>          | (AC)11                         | 494     | Dream taq (5Units/ul) | –                        | 7                  | –               | 0.75          | 1      | 0.05 | 0.25          | 0.2          | 1           | 54 | 35     | –          |
| <b>RCO8640</b>          | (C)15                          | 170-174 | type it (2x)          | –                        | 1                  | 1               | –             | –      | 5    | 1             | –            | 2           | 55 | 35     | –          |
