# Supplementary material for: Drift, selection, or migration? Processes affecting genetic differentiation and variation along a latitudinal gradient in an amphibian
Source: PubMed Central journal article supplement (PMC5557520; doi:10.1186/s12862-017-1022-z), 2017-08-14
Supplement: 12862_2017_1022_MOESM14_ESM.pdf [file 12862_2017_1022_MOESM14_ESM.pdf]

**Table S8.** 15 microsatellites and MHC II exon 2 outlier analyses results from Lositan and Bayescan. Analyses were performed independently considering: all the gradient and southern population, excluding all the German locations. Overall  $F_{ST}$  for the gradient excluding all population from Germany was 0.35.

| Loci           | Southern cluster              |                              | Gradient                      |                               |
|----------------|-------------------------------|------------------------------|-------------------------------|-------------------------------|
|                | Lositan                       | Bayescan                     | Lositan                       | Bayescan                      |
| <b>RtuP</b>    | –                             | –                            | <i>Stabilizing selection</i>  | <i>Stabilizing selection</i>  |
| <b>WRA_160</b> | –                             | –                            | –                             | <i>Stabilizing selection</i>  |
| <b>RCO8640</b> | <i>Diversifying selection</i> | –                            | <i>Diversifying selection</i> | <i>Diversifying selection</i> |
| <b>MHC</b>     | <i>Diversifying selection</i> | –                            | <i>Diversifying selection</i> | –                             |
| <b>RtCa25</b>  | –                             | <i>Stabilizing selection</i> | –                             | –                             |
| <b>RtCa18</b>  | –                             | –                            | –                             | <i>Stabilizing selection</i>  |
